# Supplementary material
Source: PubMed Central journal article supplement (PMC10988609)
Supplement: NIHMS1979975-supplement-Supplementary_material.pdf [file NIHMS1979975-supplement-Supplementary_material.pdf]

# THE LANCET

## Diabetes & Endocrinology

### Supplementary appendix

This appendix formed part of the original submission and has been peer reviewed. We post it as supplied by the authors.

Supplement to: Tomic D, Morton JI, Chen L, et al. Lifetime risk, life expectancy, and years of life lost to type 2 diabetes in 23 high-income jurisdictions: a multinational, population-based study. *Lancet Diabetes Endocrinol* 2022; published online Sept 29. [https://doi.org/10.1016/S2213-8587\(22\)00252-2](https://doi.org/10.1016/S2213-8587(22)00252-2).

## **Lifetime risk, life expectancy, and years of life lost to type 2 diabetes in 23 high-income jurisdictions: a multinational, population-based study: Supplementary material**

|                                                                                                                                                               |    |
|---------------------------------------------------------------------------------------------------------------------------------------------------------------|----|
| Supplementary text 1: Search strategy of the systematic review used to identify data sources                                                                  | 2  |
| Supplementary table 1: Summary characteristics of the data from the 23 jurisdictions                                                                          | 3  |
| Supplementary table 2: Diabetes definitions by data source                                                                                                    | 4  |
| Supplementary table 3: Incident diabetes cases and death counts for those with and without diabetes in the datasets of 23 jurisdictions                       | 5  |
| Supplementary table 4: Life expectancy of people with and without diabetes at age 40 years by jurisdiction, sex, and time-point                               | 6  |
| Supplementary table 5: Life expectancy of people with and without diabetes at age 60 years by jurisdiction, sex, and time-point                               | 7  |
| Supplementary table 6: Expected lifetime risk of developing type 2 diabetes from age 20 years to age 80 years by jurisdiction, sex, and time-point            | 8  |
| Supplementary table 7: Sensitivity analysis of varying incidence and mortality rates in Israel Maccabi Health Services 2009-10, example of high lifetime risk | 9  |
| Supplementary table 8: Sensitivity analysis of varying incidence and mortality rates in Hungary 2018-19, example of mid-range lifetime risk                   | 9  |
| Supplementary table 9: Sensitivity analysis of varying incidence and mortality rates in Lithuania 2013-14, example of low lifetime risk                       | 10 |
| Supplementary table 10: Sensitivity analysis of varying relative risks of mortality in those with and without type 2 diabetes, United Kingdom males 2007-08   | 10 |
| Supplementary table 11: Years of life lost to diabetes at age 20 years across the 23 jurisdictions                                                            | 11 |
| Supplementary table 12: Years of life lost to diabetes at age 40 years across the 23 jurisdictions                                                            | 12 |
| Supplementary table 13: Years of life lost to diabetes at age 60 years across the 23 jurisdictions                                                            | 13 |
| Supplementary figure 1: Change in life expectancy of males with and without diabetes across time-points by jurisdiction                                       | 14 |
| Supplementary figure 2: Change in life expectancy of females with and without diabetes across time-points by jurisdiction                                     | 14 |
| Supplementary figure 3: Years of life lost to diabetes at age 40 years by jurisdiction, males                                                                 | 15 |
| Supplementary figure 4: Years of life lost to diabetes at age 40 years by jurisdiction, females                                                               | 15 |
| Supplementary figure 5: Years of life lost to diabetes at age 60 years by jurisdiction, males                                                                 | 16 |
| Supplementary figure 6: Years of life lost to diabetes at age 60 years by jurisdiction, females                                                               | 16 |

## Supplementary text 1: Search strategy of the systematic review used to identify data sources

Database: Ovid MEDLINE® 1946 to Present with Daily Update

Search Strategy: 1980-2017

- 1 Diabetes Mellitus, Type 2/ep [Epidemiology]
- 2 Diabetes Mellitus/ep [Epidemiology]
- 3 Glucose Intolerance/ep [Epidemiology]
- 4 Diabetes Mellitus, Type 2/ or Diabetes Mellitus/
- 5 "inciden\*".m\_titl.
- 6 Incidence/
- 7 5 or 6
- 8 Follow-up studies/
- 9 Cohort studies/
- 10 Prospective studies/
- 11 Longitudinal studies/
- 12 1 or 2 or 3 or 4
- 13 8 or 9 or 10 or 11
- 14 7 and 12
- 15 12 and 13
- 16 14 or 15
- 17 Pragmatic Clinical Trial/ or Clinical Trial, Phase III/ or Randomized Controlled Trial/ or Trial.mp. or Clinical Trial, Phase II/ or "Trial of Labor"/ or Clinical Trial, Phase I/ or Clinical Trial, Phase IV/ or Clinical Trial/ or Controlled Clinical Trial.mp. [mp=title, abstract, original title, name of substance word, subject heading word, keyword heading word, protocol supplementary concept word, rare disease supplementary concept word, unique identifier]
- 18 16 not 17
- 19 animals/
- 20 18 not 19
- 21 Letter/
- 22 20 not 21
- 23 limit 22 to yr="1980 – end of 2017"

**Supplementary table 1: Summary characteristics of the data from the 23 jurisdictions**

| Country        | Origin of data                                                                                                                     | Type of data     | Years included in analysis | Diabetes definition                                       | Diabetes type   | Diabetes type classification |
|----------------|------------------------------------------------------------------------------------------------------------------------------------|------------------|----------------------------|-----------------------------------------------------------|-----------------|------------------------------|
| Australia      | National Diabetes Service Scheme                                                                                                   | Registry         | 2013-14 and 2018-19        | Clinical diagnosis                                        | Type 2 diabetes | Algorithm                    |
| Austria        | Austrian Social Insurance                                                                                                          | Health insurance | 2016-17                    | Anti-diabetes medications                                 | All diabetes    | ..                           |
| Canada*        | Canadian Chronic Disease Surveillance System                                                                                       | Administrative   | 2011-12 and 2016-17        | Algorithm                                                 | All diabetes    | ..                           |
| Denmark        | National Patient Register, prescription database, health insurance database, diabetes quality database, and eye screening database | Registry         | 2013-14 and 2018-19        | Algorithm                                                 | Type 2 diabetes | Algorithm                    |
| Finland        | FinDM (Diabetes in Finland) research database                                                                                      | Registry         | 2011-12 and 2016-17        | Algorithm                                                 | Type 2 diabetes | Algorithm                    |
| France         | National Health Data System                                                                                                        | Administrative   | 2016-17                    | Anti-diabetes medications                                 | All diabetes    | ..                           |
| Germany        | Statutory Health Insurance claims data                                                                                             | Health insurance | 2013-14                    | Clinical diagnosis (ICD-10)                               | Type 2 diabetes | ICD codes                    |
| Hong Kong      | Hong Kong Hospital Authority                                                                                                       | Administrative   | 2013-14 and 2018-19        | Algorithm                                                 | All diabetes    | ..                           |
| Hungary        | National Institute of Health Insurance Fund Management database                                                                    | Administrative   | 2018-19                    | Anti-diabetes medications and clinical diagnosis (ICD-10) | Type 2 diabetes | Medication                   |
| Israel*        | Clalit Health Services                                                                                                             | Health insurance | 2010-11 and 2015-16        | Algorithm                                                 | All diabetes    | ..                           |
| Israel*        | Maccabi Healthcare Services                                                                                                        | Health insurance | 2009-10 and 2014-15        | Algorithm                                                 | Type 2 diabetes | Algorithm                    |
| Italy*         | Administrative health databases                                                                                                    | Administrative   | 2013-14 and 2018-19        | Algorithm                                                 | All diabetes    | ..                           |
| Japan          | National Database of Health Insurance Claims and Specific Health Checkups of Japan                                                 | Health insurance | 2017-18                    | Anti-diabetes medications                                 | Type 2 diabetes | ICD codes                    |
| Latvia         | Latvian Diabetes Registry                                                                                                          | Registry         | 2010-11 and 2015-16        | Clinical diagnosis (ICD-10)                               | Type 2 diabetes | ICD codes                    |
| Lithuania      | National Compulsory Health Insurance Fund Information System                                                                       | Administrative   | 2013-14 and 2018-19        | Clinical diagnosis (ICD-10)                               | All diabetes    | ..                           |
| Netherlands    | NIVEL Primary Care Database                                                                                                        | Administrative   | 2015-16                    | Clinical diagnosis (ICPC-1)                               | All diabetes    | ..                           |
| Norway         | Norwegian Patient Registry, Primary Care Database and Norwegian Prescription Database                                              | Administrative   | 2013-14                    | Clinical diagnosis (ICD-10, ICPC-2)                       | Type 2 diabetes | Algorithm                    |
| Scotland       | SCI-Diabetes database                                                                                                              | Registry         | 2013-14 and 2018-19        | Clinical diagnosis (Read codes)                           | Type 2 diabetes | Clinical diagnosis           |
| Singapore      | National administrative data (Ministry of Health of Singapore)                                                                     | Administrative   | 2015-16                    | Clinical diagnosis (ICD-10)                               | All diabetes    | ..                           |
| South Korea    | National Health Insurance Service – National Sample Cohort                                                                         | Health insurance | 2009-10 and 2014-15        | Anti-diabetes medications                                 | All diabetes    | ..                           |
| Spain*         | Information System for the Development of Research in Primary Care                                                                 | Administrative   | 2010-11 and 2015-16        | Clinical diagnosis (ICD-10)                               | Type 2 diabetes | ICD codes                    |
| Taiwan         | National Health Insurance Research Database (LHID 2000)                                                                            | Health insurance | 2005-06 and 2010-11        | Algorithm                                                 | Type 2 diabetes | Algorithm                    |
| United Kingdom | THIN database                                                                                                                      | Administrative   | 2007-08 and 2012-13        | Clinical diagnosis (physician)                            | Type 2 diabetes | Algorithm                    |
| United States^ | NHIS                                                                                                                               | Survey           | 2009-10 and 2014-15        | Self-report                                               | All diabetes    | ..                           |

ICD-10 = International Classification of Diseases, version 10; ICPC-1 = International Classification of Primary Care, first version; ICPC-2 = International Classification of Primary Care, second version; NIVEL = Netherlands Institute for Health Services Research; NHIS = National Health Interview Survey; SCI = Scottish Care Information; THIN = The Health Improvement Network. \*This Canadian data source excluded data from Yukon Territory and Saskatchewan and provided data by fiscal year rather than calendar year. The Italian data source only included the Lombardy region while the Spanish source only included the Catalonia region. Israeli data sources were also not country-wide coverage. ^For United States data, unweighted data were used for incidence while weighted data were used for mortality. United States NHIS data are publicly available.

**Supplementary table 2: Diabetes definitions by data source**

| Country, region | Diabetes diagnostic method                                                                                                                                                                                                                  | Type 1 and type 2 diabetes separated | Gestational diabetes excluded |
|-----------------|---------------------------------------------------------------------------------------------------------------------------------------------------------------------------------------------------------------------------------------------|--------------------------------------|-------------------------------|
| Australia       | Clinical diagnosis certified by a doctor, nurse or credentialed diabetes educator.                                                                                                                                                          | Yes                                  | Yes                           |
| Austria         | Defined by use of anti-diabetic medications.                                                                                                                                                                                                | No                                   | No                            |
| Canada          | Algorithm incorporating $\geq 1$ hospitalisations or $\geq 2$ physician claims with evidence of diabetes within 2 years.                                                                                                                    | No                                   | Yes                           |
| Denmark         | Algorithm incorporating clinical diagnosis (ICD codes) from the hospitalisations or outpatient clinics, prescription of anti-diabetic medications, clinical and billing records.                                                            | Yes                                  | Yes                           |
| Finland         | Algorithm incorporating clinical diagnosis (ICD codes) from the Care Register for Health Care, Register of Primary Health Care Visits, Medical Birth Register and Causes of Death Statistics and prescription of anti-diabetic medications. | Yes                                  | Yes                           |
| France          | Defined by use of anti-diabetic medications.                                                                                                                                                                                                | No                                   | No                            |
| Germany         | Clinical diagnosis using ICD-10 codes.                                                                                                                                                                                                      | Yes                                  | Yes                           |
| Hong Kong       | Algorithm incorporating use of diagnostic or procedure codes (ICD-9) for all hospital admissions, diagnostic codes based on ICPC-2 WONCA (for general outpatient clinics), prescription of anti-diabetic medications and laboratory tests.  | No                                   | Yes                           |
| Hungary         | Defined by use of anti-diabetic medications.                                                                                                                                                                                                | Yes <sup>a</sup>                     | Yes                           |
| Israel, Clalit  | Algorithm incorporating annual diabetes diagnosis from hospital and community medical records, lab tests and prescription of anti-diabetic medications.                                                                                     | No <sup>a</sup>                      | Yes                           |
| Israel, Maccabi | Algorithm incorporating blood tests, prescription of anti-diabetic medications and clinical diagnosis by clinical practitioners.                                                                                                            | Yes                                  | Yes                           |
| Italy, Lombardy | Algorithm incorporating certified diagnosis from disease-specific registry, prescription of anti-diabetic medication according to ATC code A10, diagnosis-related group code of hospitalisation for diabetes.                               | No                                   | No                            |
| Japan           | Defined by use of anti-diabetic medications.                                                                                                                                                                                                | Yes                                  | Yes                           |
| Latvia          | Clinical diagnosis using ICD-10 codes.                                                                                                                                                                                                      | Yes                                  | Yes                           |
| Lithuania       | Clinical diagnosis using ICD-10 codes.                                                                                                                                                                                                      | No                                   | Yes                           |
| Netherlands     | Clinical diagnosis by ICPC codes.                                                                                                                                                                                                           | No                                   | No                            |
| Norway          | Clinical diagnosis using ICD-10 and ICPC-2 codes.                                                                                                                                                                                           | Yes <sup>a</sup>                     | No                            |
| Scotland        | Clinical diagnosis using the Read coding system.                                                                                                                                                                                            | Yes                                  | No                            |
| Singapore       | Clinical diagnosis using ICD-10 codes.                                                                                                                                                                                                      | No                                   | No                            |
| South Korea     | Defined by use of anti-diabetic medications.                                                                                                                                                                                                | No                                   | No                            |
| Spain           | Clinical diagnosis using ICD-10 codes.                                                                                                                                                                                                      | Yes                                  | Yes                           |
| Taiwan          | Algorithm incorporating a hospital discharge code of diabetes, $\geq 2$ diagnosis codes of diabetes from the outpatient clinics within one year, and prescription of anti-diabetic medications.                                             | Yes <sup>a</sup>                     | Yes <sup>b</sup>              |
| UK              | Clinical diagnosis using the Read coding system.                                                                                                                                                                                            | Yes                                  | Yes                           |
| US, NHIS        | Self-report from a series of cross-sectional studies.                                                                                                                                                                                       | No                                   | Yes                           |

<sup>a</sup>Type 2 diabetes only. <sup>b</sup>Prior gestational diabetes that later was diagnosed with type 2 diabetes was not excluded.

**Supplementary table 3: Incident type 2 diabetes cases and death counts for those with and without type 2 diabetes in the datasets of 23 jurisdictions**

| Country          | Number of years included | Person-years included (1000s) | Incident type 2 diabetes cases | Deaths in those with type 2 diabetes | Deaths in those without type 2 diabetes | Total deaths |
|------------------|--------------------------|-------------------------------|--------------------------------|--------------------------------------|-----------------------------------------|--------------|
| Australia        | 4                        | 58,141                        | 191,170                        | 97,417                               | 387,770                                 | 485,187      |
| Austria          | 2                        | 6,864                         | 56,041                         | 19,530                               | 137,673                                 | 157,203      |
| Canada           | 4                        | 104,411                       | 791,290                        | 353,580                              | 679,220                                 | 1,032,800    |
| Denmark          | 4                        | 18,693                        | 75,386                         | 41,790                               | 167,864                                 | 209,654      |
| Finland          | 4                        | 16,811                        | 109,655                        | 54,674                               | 150,426                                 | 205,100      |
| France*          | 2                        | 101,719                       | 487,204                        | ..                                   | ..                                      | ..           |
| Germany*         | 2                        | 102,277                       | 1,056,051                      | ..                                   | ..                                      | ..           |
| Hong Kong        | 4                        | 24,531                        | 194,172                        | 73,442                               | 110,470                                 | 183,912      |
| Hungary          | 2                        | 15,728                        | 105,404                        | 74,355                               | 185,043                                 | 259,398      |
| Israel (Clalit)  | 4                        | 12,209                        | 98,940                         | 56,868                               | 56,025                                  | 112,893      |
| Israel (Maccabi) | 4                        | 5,045                         | 32,790                         | 8,865                                | 14,911                                  | 23,776       |
| Italy            | 4                        | 17,962                        | 99,840                         | 45,784                               | 158,235                                 | 204,019      |
| Japan            | 2                        | 185,935                       | 1,407,156                      | 444,302                              | 1,580,202                               | 2,024,504    |
| Latvia           | 4                        | 6,469                         | 27,051                         | 12,365                               | 106,184                                 | 118,549      |
| Lithuania        | 4                        | 9,152                         | 38,445                         | 22,836                               | 135,728                                 | 158,564      |
| Netherlands*     | 2                        | 2,282                         | 11,589                         | ..                                   | ..                                      | ..           |
| Norway           | 2                        | 7,800                         | 28,286                         | 14,248                               | 67,942                                  | 82,190       |
| Scotland         | 4                        | 16,950                        | 64,169                         | 40,791                               | 183,313                                 | 224,104      |
| Singapore        | 2                        | 6,196                         | 53,417                         | 16,163                               | 20,971                                  | 37,134       |
| South Korea      | 4                        | 3,197                         | 20,069                         | 5,270                                | 15,823                                  | 21,093       |
| Spain            | 4                        | 18,119                        | 94,487                         | 50,313                               | 132,300                                 | 182,613      |
| Taiwan           | 4                        | 3,139                         | 22,121                         | 7,487                                | 12,133                                  | 19,620       |
| United Kingdom*  | 4                        | 25,044                        | 53,626                         | ..                                   | ..                                      | ..           |
| United States    | 4                        | 899,024                       | 1,226                          | 2,566,984                            | 7,551,810                               | 10,118,794   |

\*Deaths in those with and without type 2 diabetes were not provided by some jurisdictions so death rates were estimated using Human Mortality Database data. Clalit = Clalit Health Services; Maccabi = Maccabi Health Services.

**Supplementary table 4: Life expectancy of people with and without type 2 diabetes at age 40 years by jurisdiction, sex, and time-point**

|                            | Males                                                  |                                                           | Females                                                |                                                           |
|----------------------------|--------------------------------------------------------|-----------------------------------------------------------|--------------------------------------------------------|-----------------------------------------------------------|
|                            | Life expectancy for those with type 2 diabetes (years) | Life expectancy for those without type 2 diabetes (years) | Life expectancy for those with type 2 diabetes (years) | Life expectancy for those without type 2 diabetes (years) |
| <b>First time-point</b>    |                                                        |                                                           |                                                        |                                                           |
| Australia (2013-14)        | 38.3 (38.1 – 38.5)                                     | 42.4 (42.3 – 42.4)                                        | 41.6 (41.4 – 41.8)                                     | 45.3 (45.3 – 45.4)                                        |
| Canada (2011-12)           | 37.6 (37.4 – 37.7)                                     | 43.2 (43.1 – 43.2)                                        | 40.5 (40.3 – 40.6)                                     | 46.2 (46.1 – 46.2)                                        |
| Denmark (2013-14)          | 34.0 (33.7 – 34.4)                                     | 40.9 (40.8 – 41.0)                                        | 38.0 (37.6 – 38.3)                                     | 43.8 (43.7 – 43.9)                                        |
| Finland (2011-12)          | 35.5 (35.2 – 35.9)                                     | 39.6 (39.5 – 39.7)                                        | 41.5 (41.2 – 41.8)                                     | 44.5 (44.4 – 44.6)                                        |
| France (2016-17)           | 35.8 (35.8 – 35.8)                                     | 40.2 (40.2 – 40.2)                                        | 41.5 (41.5 – 41.5)                                     | 45.6 (45.6 – 45.6)                                        |
| Germany (2013-14)          | 33.9 (33.9 – 33.9)                                     | 40.2 (40.2 – 40.2)                                        | 37.9 (37.9 – 37.9)                                     | 44.3 (44.3 – 44.3)                                        |
| Hong Kong (2013-14)        | 36.7 (36.4 – 36.9)                                     | 42.8 (42.7 – 43.0)                                        | 42.9 (42.7 – 43.2)                                     | 47.8 (47.7 – 47.9)                                        |
| Hungary (2018-19)          | 29.6 (29.4 – 29.8)                                     | 34.9 (34.8 – 35.0)                                        | 35.7 (35.6 – 35.9)                                     | 40.8 (40.7 – 40.9)                                        |
| Israel (Clalit) (2010-11)  | 34.1 (33.8 – 34.4)                                     | 45.7 (45.6 – 45.9)                                        | 37.7 (37.4 – 38.0)                                     | 48.4 (48.2 – 48.5)                                        |
| Israel (Maccabi) (2009-10) | 38.9 (38.2 – 39.5)                                     | 44.9 (44.5 – 45.2)                                        | 41.4 (40.7 – 42.0)                                     | 47.7 (47.3 – 48.0)                                        |
| Italy (2013-14)            | 37.0 (36.6 – 37.3)                                     | 43.1 (43.0 – 43.2)                                        | 41.5 (41.1 – 41.8)                                     | 47.0 (46.9 – 47.1)                                        |
| Japan (2017-18)            | 40.1 (40.0 – 40.1)                                     | 45.4 (45.4 – 45.4)                                        | 44.6 (44.5 – 44.6)                                     | 49.8 (49.8 – 49.8)                                        |
| Latvia (2010-11)           | 28.3 (27.5 – 29.1)                                     | 31.3 (31.1 – 31.5)                                        | 35.3 (34.7 – 35.9)                                     | 40.0 (39.8 – 40.2)                                        |
| Lithuania (2013-14)        | 27.5 (26.8 – 28.0)                                     | 32.1 (31.9 – 32.2)                                        | 35.9 (35.4 – 36.4)                                     | 41.4 (41.2 – 41.5)                                        |
| Netherlands (2015-16)      | 37.2 (37.2 – 37.2)                                     | 41.2 (41.2 – 41.2)                                        | 37.5 (37.5 – 37.5)                                     | 45.1 (45.1 – 45.1)                                        |
| Norway (2013-14)           | 36.6 (36.2 – 37.0)                                     | 41.0 (40.9 – 41.1)                                        | 40.6 (40.2 – 41.0)                                     | 44.2 (44.0 – 44.3)                                        |
| Scotland (2009-10)         | 34.8 (34.4 – 35.1)                                     | 38.2 (38.1 – 38.3)                                        | 36.9 (36.5 – 37.4)                                     | 41.7 (41.6 – 41.8)                                        |
| Singapore (2015-16)        | 36.7 (36.3 – 37.1)                                     | 43.6 (43.3 – 43.8)                                        | 41.2 (40.9 – 41.6)                                     | 47.6 (47.4 – 47.8)                                        |
| South Korea (2009-10)      | 33.6 (32.6 – 34.5)                                     | 39.7 (39.3 – 40.1)                                        | 40.6 (39.6 – 41.6)                                     | 45.3 (44.9 – 45.6)                                        |
| Spain (2010-11)            | 38.8 (38.5 – 39.1)                                     | 42.7 (42.6 – 42.8)                                        | 44.1 (43.8 – 44.4)                                     | 47.5 (47.4 – 47.7)                                        |
| Taiwan (2005-06)           | 32.7 (31.8 – 33.6)                                     | 42.8 (42.5 – 43.2)                                        | 39.2 (38.3 – 40.0)                                     | 47.9 (47.4 – 48.3)                                        |
| United Kingdom (2007-08)   | 33.2 (33.2 – 33.2)                                     | 39.9 (39.9 – 39.9)                                        | 37.3 (37.3 – 37.3)                                     | 43.0 (43.0 – 43.0)                                        |
| United States (2009-10)    | 34.4 (34.4 – 34.5)                                     | 42.2 (42.2 – 42.3)                                        | 38.6 (38.5 – 38.6)                                     | 45.6 (45.6 – 45.6)                                        |
| <b>Second time-point</b>   |                                                        |                                                           |                                                        |                                                           |
| Australia (2018-19)        | 39.0 (38.8 – 39.2)                                     | 43.1 (43.0 – 43.2)                                        | 42.1 (41.9 – 42.3)                                     | 46.0 (45.9 – 46.1)                                        |
| Canada (2016-17)           | 38.3 (38.2 – 38.4)                                     | 43.5 (43.5 – 43.6)                                        | 41.0 (40.9 – 41.1)                                     | 46.4 (46.3 – 46.4)                                        |
| Denmark (2018-19)          | 35.1 (34.8 – 35.4)                                     | 42.0 (41.9 – 42.1)                                        | 39.0 (38.7 – 39.4)                                     | 44.6 (44.5 – 44.7)                                        |
| Finland (2016-17)          | 36.7 (36.4 – 37.0)                                     | 40.7 (40.6 – 40.9)                                        | 42.0 (41.7 – 42.2)                                     | 45.2 (45.0 – 45.3)                                        |
| Hong Kong (2018-19)        | 37.3 (37.1 – 37.6)                                     | 44.1 (44.0 – 44.3)                                        | 43.5 (43.3 – 43.7)                                     | 48.9 (48.8 – 49.0)                                        |
| Israel (Clalit) (2015-16)  | 34.8 (34.5 – 35.1)                                     | 46.8 (46.6 – 47.0)                                        | 38.4 (38.1 – 38.7)                                     | 49.1 (49.0 – 49.3)                                        |
| Israel (Maccabi) (2014-15) | 39.4 (38.9 – 40.0)                                     | 46.0 (45.6 – 46.3)                                        | 42.2 (41.6 – 42.8)                                     | 48.3 (48.0 – 48.6)                                        |
| Italy (2018-19)            | 37.9 (37.5 – 38.2)                                     | 44.1 (43.9 – 44.2)                                        | 42.3 (42.0 – 42.7)                                     | 47.3 (47.2 – 47.4)                                        |
| Latvia (2015-16)           | 30.6 (29.8 – 31.3)                                     | 32.6 (32.4 – 32.7)                                        | 37.5 (36.9 – 38.0)                                     | 40.9 (40.7 – 41.1)                                        |
| Lithuania (2018-19)        | 29.0 (28.5 – 29.6)                                     | 33.8 (33.7 – 34.0)                                        | 37.7 (37.2 – 38.1)                                     | 42.3 (42.2 – 42.4)                                        |
| Scotland (2014-15)         | 35.7 (35.3 – 36.0)                                     | 39.1 (39.0 – 39.2)                                        | 37.4 (37.0 – 37.7)                                     | 42.3 (42.2 – 42.4)                                        |
| South Korea (2014-15)      | 35.6 (34.8 – 36.4)                                     | 41.6 (41.2 – 41.9)                                        | 42.5 (41.7 – 43.3)                                     | 46.8 (46.4 – 47.1)                                        |
| Spain (2015-16)            | 37.1 (36.8 – 37.4)                                     | 40.4 (40.3 – 40.6)                                        | 42.7 (42.4 – 42.9)                                     | 45.4 (45.3 – 45.5)                                        |
| Taiwan (2010-11)           | 35.0 (34.2 – 35.8)                                     | 44.9 (44.5 – 45.3)                                        | 41.4 (40.7 – 42.1)                                     | 49.4 (49.0 – 49.8)                                        |
| United Kingdom (2012-13)   | 35.0 (35.0 – 35.0)                                     | 41.1 (41.1 – 41.1)                                        | 38.7 (38.7 – 38.7)                                     | 43.9 (43.9 – 43.9)                                        |
| United States (2014-15)    | 36.0 (35.9 – 36.0)                                     | 41.9 (41.9 – 41.9)                                        | 39.0 (39.0 – 39.1)                                     | 45.9 (45.9 – 45.9)                                        |

Life expectancy at age 40 is an estimate of the number of years of life remaining at age 40. Data in parentheses represent 2.5% and 97.5% confidence intervals. Clalit = Clalit Health Services; Maccabi = Maccabi Health Services.

**Supplementary table 5: Life expectancy of people with and without type 2 diabetes at age 60 years by jurisdiction, sex, and time-point**

|                            | Males                                                  |                                                           | Females                                                |                                                           |
|----------------------------|--------------------------------------------------------|-----------------------------------------------------------|--------------------------------------------------------|-----------------------------------------------------------|
|                            | Life expectancy for those with type 2 diabetes (years) | Life expectancy for those without type 2 diabetes (years) | Life expectancy for those with type 2 diabetes (years) | Life expectancy for those without type 2 diabetes (years) |
| <b>First time-point</b>    |                                                        |                                                           |                                                        |                                                           |
| Australia (2013-14)        | 21·0 (20·9 – 21·1)                                     | 24·2 (24·2 – 24·3)                                        | 23·4 (23·2 – 23·5)                                     | 26·4 (26·3 – 26·4)                                        |
| Canada (2011-12)           | 20·7 (20·6 – 20·8)                                     | 24·9 (24·9 – 25·0)                                        | 22·9 (22·8 – 22·9)                                     | 27·2 (27·1 – 27·2)                                        |
| Denmark (2013-14)          | 17·8 (17·6 – 18·0)                                     | 22·7 (22·6 – 22·8)                                        | 20·6 (20·4 – 20·9)                                     | 24·9 (24·8 – 24·9)                                        |
| Finland (2011-12)          | 19·1 (18·9 – 19·3)                                     | 22·0 (21·9 – 22·1)                                        | 23·1 (22·9 – 23·3)                                     | 25·5 (25·4 – 25·6)                                        |
| France (2016-17)           | 20·1 (20·1 – 20·1)                                     | 22·7 (22·7 – 22·7)                                        | 23·8 (23·8 – 23·8)                                     | 27·1 (27·1 – 27·1)                                        |
| Germany (2013-14)          | 18·7 (18·7 – 18·7)                                     | 22·3 (22·3 – 22·3)                                        | 21·7 (21·7 – 21·7)                                     | 25·7 (25·7 – 25·7)                                        |
| Hong Kong (2013-14)        | 20·6 (20·4 – 20·8)                                     | 24·3 (24·2 – 24·4)                                        | 24·8 (24·6 – 25·0)                                     | 28·6 (28·5 – 28·7)                                        |
| Hungary (2018-19)          | 15·4 (15·3 – 15·5)                                     | 18·5 (18·4 – 18·5)                                        | 18·8 (18·7 – 18·9)                                     | 22·5 (22·5 – 22·6)                                        |
| Israel (Clalit) (2010-11)  | 18·3 (18·1 – 18·4)                                     | 27·4 (27·3 – 27·6)                                        | 20·3 (20·1 – 20·5)                                     | 29·1 (29·0 – 29·3)                                        |
| Israel (Maccabi) (2009-10) | 21·3 (20·9 – 21·7)                                     | 26·4 (26·0 – 26·7)                                        | 23·1 (22·6 – 23·6)                                     | 28·5 (28·2 – 28·8)                                        |
| Italy (2013-14)            | 20·5 (20·2 – 20·7)                                     | 24·5 (24·4 – 24·6)                                        | 23·5 (23·2 – 23·7)                                     | 27·7 (27·6 – 27·7)                                        |
| Japan (2017-18)            | 22·8 (22·7 – 22·8)                                     | 26·4 (26·3 – 26·4)                                        | 26·3 (26·2 – 26·3)                                     | 30·2 (30·2 – 30·2)                                        |
| Latvia (2010-11)           | 14·9 (14·5 – 15·3)                                     | 16·4 (16·3 – 16·5)                                        | 18·9 (18·6 – 19·3)                                     | 22·1 (22·0 – 22·3)                                        |
| Lithuania (2013-14)        | 14·7 (14·4 – 15·0)                                     | 17·2 (17·1 – 17·3)                                        | 19·2 (18·9 – 19·5)                                     | 23·1 (23·0 – 23·2)                                        |
| Netherlands (2015-16)      | 19·5 (19·5 – 19·5)                                     | 22·8 (22·8 – 22·8)                                        | 20·1 (20·1 – 20·1)                                     | 26·5 (26·5 – 26·5)                                        |
| Norway (2013-14)           | 19·6 (19·4 – 19·8)                                     | 22·7 (22·6 – 22·8)                                        | 22·4 (22·1 – 22·7)                                     | 25·2 (25·1 – 25·3)                                        |
| Scotland (2009-10)         | 18·5 (18·2 – 18·7)                                     | 21·0 (20·9 – 21·0)                                        | 20·1 (19·9 – 20·4)                                     | 23·4 (23·3 – 23·5)                                        |
| Singapore (2015-16)        | 21·1 (20·8 – 21·4)                                     | 25·0 (24·9 – 25·2)                                        | 23·8 (23·5 – 24·0)                                     | 28·5 (28·3 – 28·7)                                        |
| South Korea (2009-10)      | 17·9 (17·3 – 18·5)                                     | 22·0 (21·7 – 22·3)                                        | 22·6 (21·9 – 23·3)                                     | 26·3 (26·0 – 26·6)                                        |
| Spain (2010-11)            | 21·4 (21·2 – 21·6)                                     | 24·4 (24·3 – 24·6)                                        | 25·2 (24·9 – 25·4)                                     | 28·3 (28·2 – 28·4)                                        |
| Taiwan (2005-06)           | 18·5 (18·0 – 19·0)                                     | 25·3 (25·0 – 25·6)                                        | 22·1 (21·5 – 22·6)                                     | 29·1 (28·7 – 29·4)                                        |
| United Kingdom (2007-08)   | 18·1 (18·1 – 18·1)                                     | 21·8 (21·8 – 21·8)                                        | 21·1 (21·1 – 21·1)                                     | 24·4 (24·4 – 24·4)                                        |
| United States (2009-10)    | 20·0 (20·0 – 20·0)                                     | 24·6 (24·6 – 24·6)                                        | 22·5 (22·5 – 22·6)                                     | 27·2 (27·2 – 27·2)                                        |
| <b>Second time-point</b>   |                                                        |                                                           |                                                        |                                                           |
| Australia (2018-19)        | 21·6 (21·4 – 21·7)                                     | 24·9 (24·8 – 24·9)                                        | 23·8 (23·7 – 23·9)                                     | 26·9 (26·9 – 27·0)                                        |
| Canada (2016-17)           | 21·2 (21·2 – 21·3)                                     | 25·2 (25·2 – 25·3)                                        | 23·2 (23·1 – 23·3)                                     | 27·3 (27·3 – 27·4)                                        |
| Denmark (2018-19)          | 18·5 (18·3 – 18·7)                                     | 23·6 (23·5 – 23·7)                                        | 21·1 (20·9 – 21·3)                                     | 25·5 (25·4 – 25·6)                                        |
| Finland (2016-17)          | 19·8 (19·7 – 20·0)                                     | 22·8 (22·7 – 22·9)                                        | 23·5 (23·3 – 23·7)                                     | 26·0 (25·9 – 26·1)                                        |
| Hong Kong (2018-19)        | 21·3 (21·1 – 21·4)                                     | 25·5 (25·4 – 25·6)                                        | 25·4 (25·2 – 25·5)                                     | 29·6 (29·5 – 29·8)                                        |
| Israel (Clalit) (2015-16)  | 18·7 (18·5 – 18·8)                                     | 28·3 (28·1 – 28·4)                                        | 20·8 (20·6 – 21·0)                                     | 29·8 (29·7 – 30·0)                                        |
| Israel (Maccabi) (2014-15) | 21·6 (21·2 – 22·0)                                     | 27·2 (26·9 – 27·5)                                        | 23·7 (23·3 – 24·1)                                     | 28·9 (28·7 – 29·2)                                        |
| Italy (2018-19)            | 21·0 (20·8 – 21·2)                                     | 25·2 (25·1 – 25·3)                                        | 24·0 (23·7 – 24·2)                                     | 27·9 (27·8 – 27·9)                                        |
| Latvia (2015-16)           | 16·2 (15·8 – 16·6)                                     | 17·3 (17·2 – 17·4)                                        | 20·2 (19·9 – 20·5)                                     | 22·7 (22·6 – 22·9)                                        |
| Lithuania (2018-19)        | 15·6 (15·3 – 15·8)                                     | 18·1 (18·0 – 18·2)                                        | 20·4 (20·1 – 20·7)                                     | 23·7 (23·6 – 23·8)                                        |
| Scotland (2014-15)         | 19·0 (18·8 – 19·2)                                     | 21·5 (21·4 – 21·6)                                        | 20·2 (19·9 – 20·4)                                     | 23·8 (23·7 – 23·9)                                        |
| South Korea (2014-15)      | 19·5 (18·9 – 20·0)                                     | 23·4 (23·1 – 23·7)                                        | 24·2 (23·5 – 24·7)                                     | 27·6 (27·2 – 27·8)                                        |
| Spain (2015-16)            | 20·0 (19·8 – 20·1)                                     | 22·3 (22·2 – 22·4)                                        | 23·8 (23·6 – 24·0)                                     | 26·1 (26·1 – 26·2)                                        |
| Taiwan (2010-11)           | 20·1 (19·6 – 20·6)                                     | 27·2 (26·9 – 27·5)                                        | 23·6 (23·1 – 24·1)                                     | 30·5 (30·2 – 30·8)                                        |
| United Kingdom (2012-13)   | 19·5 (19·5 – 19·5)                                     | 22·9 (22·9 – 22·9)                                        | 22·2 (22·2 – 22·2)                                     | 25·2 (25·2 – 25·2)                                        |
| United States (2014-15)    | 20·6 (20·6 – 20·7)                                     | 24·5 (24·5 – 24·6)                                        | 22·9 (22·9 – 22·9)                                     | 27·5 (27·5 – 27·6)                                        |

Life expectancy at age 60 is an estimate of the number of years of life remaining at age 60. Data in parentheses represent 2·5% and 97·5% confidence intervals. Clalit = Clalit Health Services; Maccabi = Maccabi Health Services.



**Supplementary table 6: Expected lifetime risk of developing type 2 diabetes from age 20 years to age 80 years by jurisdiction, sex, and time-point**

|                                     | Males                             |                                    |                               | Females                           |                                    |                               |
|-------------------------------------|-----------------------------------|------------------------------------|-------------------------------|-----------------------------------|------------------------------------|-------------------------------|
|                                     | Lifetime risk at first time-point | Lifetime risk at second time-point | Difference across time-points | Lifetime risk at first time-point | Lifetime risk at second time-point | Difference across time-points |
| Australia (2013-14, 2018-19)        | 27.0% (26.6 – 27.4)               | 20.8% (20.4 – 21.1)                | - 6.2%                        | 20.2% (19.8 – 20.6)               | 14.4% (14.0 – 14.7)                | - 5.8%                        |
| Austria* (2016-17)                  | 24.5% (24.0 – 24.9)               | ..                                 | ..                            | 20.5% (20.0 – 20.9)               | ..                                 | ..                            |
| Canada (2011-12, 2016-17)           | 42.9% (42.5 – 43.2)               | 41.1% (40.8 – 41.4)                | - 1.8%                        | 35.7% (35.4 – 36.0)               | 33.8% (33.5 – 34.1)                | - 1.9%                        |
| Denmark (2013-14, 2018-19)          | 24.5% (23.9 – 25.2)               | 24.7% (24.0 – 25.4)                | + 0.2%                        | 19.4% (18.7 – 20.0)               | 19.0% (18.3 – 19.6)                | - 0.4%                        |
| Finland (2011-12, 2016-17)          | 40.2% (39.4 – 40.9)               | 32.2% (31.5 – 33.0)                | - 8.0%                        | 35.4% (34.6 – 36.1)               | 25.5% (24.8 – 26.2)                | - 9.9%                        |
| France (2016-17)                    | 28.3% (28.1 – 28.5)               | ..                                 | ..                            | 21.9% (21.7 – 22.1)               | ..                                 | ..                            |
| Germany (2013-14)                   | 46.3% (46.1 – 46.5)               | ..                                 | ..                            | 40.0% (39.8 – 40.1)               | ..                                 | ..                            |
| Hong Kong (2013-14, 2018-19)        | 46.4% (45.7 – 47.0)               | 50.6% (50.0 – 51.2)                | + 4.2%                        | 42.1% (41.4 – 42.8)               | 43.6% (42.9 – 44.2)                | + 1.5%                        |
| Hungary (2018-19)                   | 33.7% (33.2 – 34.2)               | ..                                 | ..                            | 32.2% (31.7 – 32.7)               | ..                                 | ..                            |
| Israel (Clalit) (2010-11, 2015-16)  | 51.2% (50.2 – 52.1)               | 43.0% (42.0 – 43.9)                | - 8.2%                        | 48.9% (48.0 – 49.8)               | 36.8% (35.8 – 37.7)                | - 12.1%                       |
| Israel (Maccabi) (2009-10, 2014-15) | 47.7% (45.9 – 49.4)               | 49.6% (48.0 – 51.1)                | + 1.9%                        | 42.3% (40.6 – 43.9)               | 40.9% (39.4 – 42.4)                | - 1.4%                        |
| Italy (2013-14, 2018-19)            | 29.4% (28.7 – 30.0)               | 31.8% (31.0 – 32.5)                | + 2.4%                        | 26.3% (25.5 – 27.0)               | 31.0% (30.1 – 31.8)                | + 4.7%                        |
| Japan (2017-18)                     | 45.7% (45.5 – 45.9)               | ..                                 | ..                            | 29.0% (28.9 – 29.2)               | ..                                 | ..                            |
| Latvia (2010-11, 2015-16)           | 17.2% (16.3 – 18.1)               | 16.4% (15.5 – 17.3)                | - 0.8%                        | 24.7% (23.7 – 25.6)               | 20.2% (19.3 – 21.1)                | - 4.5%                        |
| Lithuania (2013-14, 2018-19)        | 16.6% (15.8 – 17.4)               | 21.9% (21.0 – 22.8)                | + 5.3%                        | 19.9% (19.1 – 20.7)               | 23.2% (22.3 – 24.1)                | + 3.3%                        |
| Netherlands (2015-16)               | 29.3% (27.9 – 30.7)               | ..                                 | ..                            | 24.1% (22.7 – 25.4)               | ..                                 | ..                            |
| Norway (2013-14)                    | 24.2% (23.4 – 24.9)               | ..                                 | ..                            | 18.2% (17.5 – 18.8)               | ..                                 | ..                            |
| Scotland (2013-14, 2018-19)         | 26.7% (26.0 – 27.4)               | 21.1% (20.4 – 21.7)                | - 5.6%                        | 19.7% (19.0 – 20.3)               | 14.9% (14.3 – 15.5)                | - 4.8%                        |
| Singapore (2015-16)                 | 53.8% (52.8 – 54.7)               | ..                                 | ..                            | 49.5% (48.5 – 50.4)               | ..                                 | ..                            |
| South Korea (2009-10, 2014-15)      | 40.9% (39.0 – 42.8)               | 38.7% (36.9 – 40.5)                | - 2.2%                        | 37.4% (35.6 – 39.3)               | 33.3% (31.5 – 35.1)                | - 4.1%                        |
| Spain (2010-11, 2015-16)            | 41.9% (41.1 – 42.6)               | 31.0% (30.2 – 31.7)                | - 10.9%                       | 31.6% (30.8 – 32.3)               | 21.7% (21.1 – 22.4)                | - 9.9%                        |
| Taiwan (2005-06, 2010-11)           | 47.0% (45.0 – 48.9)               | 44.4% (42.4 – 46.3)                | - 2.6%                        | 50.3% (48.2 – 52.4)               | 42.9% (40.9 – 45.0)                | - 7.4%                        |
| United Kingdom (2007-08, 2012-13)   | 30.1% (29.3 – 30.9)               | 24.6% (23.9 – 25.4)                | - 5.5%                        | 20.8% (20.1 – 21.4)               | 16.3% (15.7 – 16.9)                | - 4.5%                        |
| United States (2009-10, 2014-15)    | 44.7% (44.6 – 44.8)               | 32.2% (32.1 – 32.3)                | - 12.5%                       | 37.9% (37.8 – 38.0)               | 34.3% (34.2 – 34.4)                | - 3.6%                        |

Data in parentheses represent 2.5% and 97.5% confidence intervals. Data for Austria represent lifetime risk from age 50. Clalit = Clalit Health Services; Maccabi = Maccabi Health Services.

**Supplementary table 7: Sensitivity analysis of varying incidence and mortality rates in Israel Maccabi Health Services 2009-10, example of high lifetime risk**

|                                                          | Males         |                                                                        |                                                                           |                                               | Females       |                                                                        |                                                                           |                                               |
|----------------------------------------------------------|---------------|------------------------------------------------------------------------|---------------------------------------------------------------------------|-----------------------------------------------|---------------|------------------------------------------------------------------------|---------------------------------------------------------------------------|-----------------------------------------------|
|                                                          | Lifetime risk | Life expectancy at age 20 years for those with type 2 diabetes (years) | Life expectancy at age 20 years for those without type 2 diabetes (years) | Years of life lost to type 2 diabetes (years) | Lifetime risk | Life expectancy at age 20 years for those with type 2 diabetes (years) | Life expectancy at age 20 years for those without type 2 diabetes (years) | Years of life lost to type 2 diabetes (years) |
| Original result                                          | 52.0%         | 58.3                                                                   | 64.5                                                                      | 6.2                                           | 47.7%         | 61.0                                                                   | 67.5                                                                      | 6.5                                           |
| 10% increased incidence                                  | 55.2%         | 58.3                                                                   | 64.5                                                                      | 6.2                                           | 50.8%         | 61.0                                                                   | 67.5                                                                      | 6.5                                           |
| 10% decreased incidence                                  | 48.4%         | 58.3                                                                   | 64.5                                                                      | 6.2                                           | 44.2%         | 61.0                                                                   | 67.5                                                                      | 6.5                                           |
| 10% increased mortality in those with type 2 diabetes    | 51.9%         | 57.3                                                                   | 64.5                                                                      | 7.2                                           | 47.6%         | 60.1                                                                   | 67.5                                                                      | 7.4                                           |
| 10% decreased mortality in those with type 2 diabetes    | 51.9%         | 59.4                                                                   | 64.5                                                                      | 5.1                                           | 47.6%         | 62.0                                                                   | 67.5                                                                      | 5.5                                           |
| 10% increased mortality in those without type 2 diabetes | 51.2%         | 58.3                                                                   | 63.6                                                                      | 5.3                                           | 47.1%         | 61.0                                                                   | 66.7                                                                      | 5.7                                           |
| 10% decreased mortality in those without type 2 diabetes | 52.7%         | 58.3                                                                   | 65.5                                                                      | 7.2                                           | 48.2%         | 61.0                                                                   | 68.3                                                                      | 7.3                                           |

**Supplementary table 8: Sensitivity analysis of varying incidence and mortality rates in Hungary 2018-19, example of mid-range lifetime risk**

|                                                          | Males         |                                                                        |                                                                           |                                               | Females       |                                                                        |                                                                           |                                               |
|----------------------------------------------------------|---------------|------------------------------------------------------------------------|---------------------------------------------------------------------------|-----------------------------------------------|---------------|------------------------------------------------------------------------|---------------------------------------------------------------------------|-----------------------------------------------|
|                                                          | Lifetime risk | Life expectancy at age 20 years for those with type 2 diabetes (years) | Life expectancy at age 20 years for those without type 2 diabetes (years) | Years of life lost to type 2 diabetes (years) | Lifetime risk | Life expectancy at age 20 years for those with type 2 diabetes (years) | Life expectancy at age 20 years for those without type 2 diabetes (years) | Years of life lost to type 2 diabetes (years) |
| Original result                                          | 35.5%         | 47.2                                                                   | 53.7                                                                      | 6.5                                           | 35.7%         | 54.9                                                                   | 60.4                                                                      | 5.5                                           |
| 10% increased incidence                                  | 38.0%         | 47.2                                                                   | 53.7                                                                      | 6.5                                           | 38.3%         | 54.9                                                                   | 60.4                                                                      | 5.5                                           |
| 10% decreased incidence                                  | 32.7%         | 47.2                                                                   | 53.7                                                                      | 6.5                                           | 32.8%         | 54.9                                                                   | 60.4                                                                      | 5.5                                           |
| 10% increased mortality in those with type 2 diabetes    | 35.5%         | 45.9                                                                   | 53.7                                                                      | 7.8                                           | 35.6%         | 53.9                                                                   | 60.4                                                                      | 6.5                                           |
| 10% decreased mortality in those with type 2 diabetes    | 35.5%         | 48.6                                                                   | 53.7                                                                      | 5.1                                           | 35.6%         | 56.0                                                                   | 60.4                                                                      | 4.4                                           |
| 10% increased mortality in those without type 2 diabetes | 34.3%         | 47.2                                                                   | 52.6                                                                      | 5.4                                           | 34.8%         | 54.9                                                                   | 59.5                                                                      | 4.6                                           |
| 10% decreased mortality in those without type 2 diabetes | 36.7%         | 47.2                                                                   | 54.9                                                                      | 7.7                                           | 36.5%         | 54.9                                                                   | 61.4                                                                      | 6.5                                           |

**Supplementary table 9: Sensitivity analysis of varying incidence and mortality rates in Lithuania 2013-14, example of low lifetime risk**

|                                                          | Males         |                                                                        |                                                                           |                                               | Females       |                                                                        |                                                                           |                                               |
|----------------------------------------------------------|---------------|------------------------------------------------------------------------|---------------------------------------------------------------------------|-----------------------------------------------|---------------|------------------------------------------------------------------------|---------------------------------------------------------------------------|-----------------------------------------------|
|                                                          | Lifetime risk | Life expectancy at age 20 years for those with type 2 diabetes (years) | Life expectancy at age 20 years for those without type 2 diabetes (years) | Years of life lost to type 2 diabetes (years) | Lifetime risk | Life expectancy at age 20 years for those with type 2 diabetes (years) | Life expectancy at age 20 years for those without type 2 diabetes (years) | Years of life lost to type 2 diabetes (years) |
| Original result                                          | 17.3%         | 43.7                                                                   | 50.0                                                                      | 6.3                                           | 21.7%         | 54.9                                                                   | 61.0                                                                      | 6.1                                           |
| 10% increased incidence                                  | 18.7%         | 43.7                                                                   | 49.9                                                                      | 6.2                                           | 23.5%         | 54.9                                                                   | 61.0                                                                      | 6.1                                           |
| 10% decreased incidence                                  | 15.7%         | 43.7                                                                   | 49.9                                                                      | 6.2                                           | 19.7%         | 54.9                                                                   | 61.0                                                                      | 6.1                                           |
| 10% increased mortality in those with type 2 diabetes    | 17.2%         | 42.3                                                                   | 49.9                                                                      | 7.6                                           | 21.6%         | 53.8                                                                   | 61.0                                                                      | 7.2                                           |
| 10% decreased mortality in those with type 2 diabetes    | 17.2%         | 45.2                                                                   | 49.9                                                                      | 4.7                                           | 21.6%         | 56.1                                                                   | 61.0                                                                      | 4.9                                           |
| 10% increased mortality in those without type 2 diabetes | 16.6%         | 43.7                                                                   | 48.7                                                                      | 5.0                                           | 21.2%         | 54.9                                                                   | 60.1                                                                      | 5.2                                           |
| 10% decreased mortality in those without type 2 diabetes | 17.9%         | 43.7                                                                   | 51.3                                                                      | 7.6                                           | 22.1%         | 54.9                                                                   | 62.0                                                                      | 7.1                                           |

**Supplementary table 10: Sensitivity analysis of varying relative risks of mortality in those with and without type 2 diabetes, United Kingdom males 2007-08**

|                    | Lifetime risk | Life expectancy at age 20 years for those with type 2 diabetes (years) | Life expectancy at age 20 years for those without type 2 diabetes (years) | Years of life lost to type 2 diabetes (years) |
|--------------------|---------------|------------------------------------------------------------------------|---------------------------------------------------------------------------|-----------------------------------------------|
| Original result    | 32.4%         | 49.6                                                                   | 59.0                                                                      | 9.4                                           |
| Relative risk* = 2 | 32.4%         | 52.2                                                                   | 59.3                                                                      | 7.1                                           |
| Relative risk* = 3 | 33.3%         | 49.0                                                                   | 60.4                                                                      | 11.4                                          |

\*Relative risk represents risk of all-cause mortality in those with compared to those without type 2 diabetes

**Supplementary table 11: Years of life lost to diabetes at age 20 years across the 23 jurisdictions**

|                                     | Males                                                                     |                                                                            | Females                                                                   |                                                                            |
|-------------------------------------|---------------------------------------------------------------------------|----------------------------------------------------------------------------|---------------------------------------------------------------------------|----------------------------------------------------------------------------|
|                                     | Years of life lost to type 2 diabetes at age 20 (95% CI), first timepoint | Years of life lost to type 2 diabetes at age 20 (95% CI), second timepoint | Years of life lost to type 2 diabetes at age 20 (95% CI), first timepoint | Years of life lost to type 2 diabetes at age 20 (95% CI), second timepoint |
| Australia (2013-14, 2018-19)        | 4.4 (4.2 – 4.5)                                                           | 4.4 (4.2 – 4.5)                                                            | 4.0 (3.7 – 4.1)                                                           | 4.1 (3.9 – 4.3)                                                            |
| Austria* (2016-17)                  | 4.0 (3.8 – 4.2)                                                           | ..                                                                         | 3.6 (3.4 – 3.9)                                                           | ..                                                                         |
| Canada (2011-12, 2016-17)           | 6.3 (6.1 – 6.3)                                                           | 5.7 (5.6 – 5.7)                                                            | 6.2 (6.1 – 6.3)                                                           | 5.8 (5.8 – 5.9)                                                            |
| Denmark (2013-14, 2018-19)          | 7.7 (7.4 – 8.0)                                                           | 7.6 (7.3 – 7.8)                                                            | 6.4 (6.0 – 6.7)                                                           | 5.9 (5.7 – 6.2)                                                            |
| Finland (2011-12, 2016-17)          | 4.5 (4.3 – 4.8)                                                           | 4.5 (4.3 – 4.7)                                                            | 3.1 (2.9 – 3.3)                                                           | 3.3 (3.1 – 3.5)                                                            |
| France (2016-17)                    | 5.1 (5.1 – 5.1)                                                           | ..                                                                         | 4.4 (4.4 – 4.4)                                                           | ..                                                                         |
| Germany (2013-14)                   | 9.0 (9.0 – 9.0)                                                           | ..                                                                         | 7.8 (7.8 – 7.8)                                                           | ..                                                                         |
| Hong Kong (2013-14, 2018-19)        | 7.3 (7.2 – 7.6)                                                           | 8.0 (7.9 – 8.2)                                                            | 5.2 (5.0 – 5.4)                                                           | 5.8 (5.6 – 5.9)                                                            |
| Hungary (2018-19)                   | 6.5 (6.3 – 6.7)                                                           | ..                                                                         | 5.5 (5.4 – 5.6)                                                           | ..                                                                         |
| Israel (Clalit) (2010-11, 2015-16)  | 12.7 (12.5 – 12.9)                                                        | 12.9 (12.7 – 13.0)                                                         | 11.2 (11.1 – 11.4)                                                        | 11.2 (11.1 – 11.4)                                                         |
| Israel (Maccabi) (2009-10, 2014-15) | 6.2 (5.9 – 6.6)                                                           | 6.8 (6.6 – 7.0)                                                            | 6.2 (6.2 – 7.0)                                                           | 6.2 (6.0 – 6.6)                                                            |
| Italy (2013-14, 2018-19)            | 7.0 (6.8 – 7.4)                                                           | 6.9 (6.7 – 7.2)                                                            | 5.9 (5.6 – 6.3)                                                           | 5.2 (5.0 – 5.5)                                                            |
| Japan (2017-18)                     | 6.0 (6.0 – 6.0)                                                           | ..                                                                         | 5.6 (5.6 – 5.7)                                                           | ..                                                                         |
| Latvia (2010-11, 2015-16)           | 4.1 (3.1 – 5.1)                                                           | 2.5 (1.7 – 3.4)                                                            | 5.3 (4.8 – 5.9)                                                           | 3.8 (3.4 – 4.2)                                                            |
| Lithuania (2013-14, 2018-19)        | 6.3 (5.5 – 7.1)                                                           | 6.3 (5.8 – 7.0)                                                            | 6.1 (5.7 – 6.6)                                                           | 5.1 (4.8 – 5.5)                                                            |
| Netherlands (2015-16)               | 4.1 (4.1 – 4.1)                                                           | ..                                                                         | 8.0 (8.0 – 8.0)                                                           | ..                                                                         |
| Norway (2013-14)                    | 4.8 (4.6 – 5.2)                                                           | ..                                                                         | 3.8 (3.5 – 4.2)                                                           | ..                                                                         |
| Scotland (2013-14, 2018-19)         | 3.8 (3.5 – 4.0)                                                           | 4.2 (4.0 – 4.4)                                                            | 5.6 (5.3 – 5.9)                                                           | 6.2 (5.9 – 6.5)                                                            |
| Singapore (2015-16)                 | 8.3 (8.1 – 8.7)                                                           | ..                                                                         | 7.0 (6.8 – 7.3)                                                           | ..                                                                         |
| South Korea (2009-10, 2014-15)      | 7.1 (6.4 – 8.0)                                                           | 7.0 (6.4 – 7.7)                                                            | 4.9 (4.2 – 5.7)                                                           | 4.5 (4.0 – 5.1)                                                            |
| Spain (2010-11, 2015-16)            | 4.2 (4.0 – 4.4)                                                           | 3.7 (3.5 – 4.0)                                                            | 3.5 (3.4 – 3.7)                                                           | 2.8 (2.6 – 2.9)                                                            |
| Taiwan (2005-06, 2010-11)           | 12.1 (11.4 – 12.9)                                                        | 11.5 (10.9 – 12.1)                                                         | 9.3 (8.7 – 9.8)                                                           | 8.3 (7.9 – 8.8)                                                            |
| United Kingdom (2007-08, 2012-13)   | 9.4 (9.4 – 9.4)                                                           | 8.6 (8.6 – 8.6)                                                            | 7.1 (7.1 – 7.1)                                                           | 6.6 (6.6 – 6.6)                                                            |
| United States (2009-10, 2014-15)    | 9.9 (9.9 – 9.9)                                                           | 7.2 (7.1 – 7.2)                                                            | 8.3 (8.2 – 8.3)                                                           | 8.1 (8.0 – 8.1)                                                            |

Data in parentheses represent 2.5% and 97.5% confidence intervals. Data for Austria represent lifetime risk from age 50. Clalit = Clalit Health Services; Maccabi = Maccabi Health Services.

**Supplementary table 12: Years of life lost to diabetes at age 40 years across the 23 jurisdictions**

|                                     | Males                                                                     |                                                                            | Females                                                                   |                                                                            |
|-------------------------------------|---------------------------------------------------------------------------|----------------------------------------------------------------------------|---------------------------------------------------------------------------|----------------------------------------------------------------------------|
|                                     | Years of life lost to type 2 diabetes at age 20 (95% CI), first timepoint | Years of life lost to type 2 diabetes at age 20 (95% CI), second timepoint | Years of life lost to type 2 diabetes at age 20 (95% CI), first timepoint | Years of life lost to type 2 diabetes at age 20 (95% CI), second timepoint |
| Australia (2013-14, 2018-19)        | 4.1 (3.9 – 4.2)                                                           | 4.1 (4.0 – 4.2)                                                            | 3.7 (3.6 – 3.9)                                                           | 3.9 (3.8 – 4.0)                                                            |
| Canada (2011-12, 2016-17)           | 5.6 (5.5 – 5.7)                                                           | 5.2 (5.2 – 5.3)                                                            | 5.7 (5.6 – 5.8)                                                           | 5.4 (5.3 – 5.4)                                                            |
| Denmark (2013-14, 2018-19)          | 6.9 (6.6 – 7.1)                                                           | 6.9 (6.7 – 7.1)                                                            | 5.8 (5.6 – 6.1)                                                           | 5.6 (5.3 – 5.8)                                                            |
| Finland (2011-12, 2016-17)          | 4.1 (3.8 – 4.3)                                                           | 4.0 (3.9 – 4.2)                                                            | 3.0 (2.8 – 3.2)                                                           | 3.2 (3.1 – 3.3)                                                            |
| France (2016-17)                    | 4.4 (4.4 – 4.4)                                                           | ..                                                                         | 4.1 (4.1 – 4.1)                                                           | ..                                                                         |
| Germany (2013-14)                   | 6.3 (6.3 – 6.3)                                                           | ..                                                                         | 6.4 (6.4 – 6.4)                                                           | ..                                                                         |
| Hong Kong (2013-14, 2018-19)        | 6.1 (6.1 – 6.3)                                                           | 6.8 (6.7 – 6.9)                                                            | 4.9 (4.7 – 5.0)                                                           | 5.4 (5.3 – 5.5)                                                            |
| Hungary (2018-19)                   | 5.3 (5.2 – 5.4)                                                           | ..                                                                         | 5.1 (5.0 – 5.1)                                                           | ..                                                                         |
| Israel (Clalit) (2010-11, 2015-16)  | 11.6 (11.5 – 11.8)                                                        | 12.0 (11.9 – 12.1)                                                         | 10.7 (10.5 – 10.8)                                                        | 10.7 (10.6 – 10.9)                                                         |
| Israel (Maccabi) (2009-10, 2014-15) | 6.0 (5.7 – 6.3)                                                           | 6.6 (6.3 – 6.7)                                                            | 6.3 (6.0 – 6.6)                                                           | 6.1 (5.8 – 6.4)                                                            |
| Italy (2013-14, 2018-19)            | 6.1 (5.9 – 6.4)                                                           | 6.2 (6.0 – 6.4)                                                            | 5.5 (5.3 – 5.8)                                                           | 5.0 (4.7 – 5.2)                                                            |
| Japan (2017-18)                     | 5.3 (5.3 – 5.4)                                                           | ..                                                                         | 5.2 (5.2 – 5.3)                                                           | ..                                                                         |
| Latvia (2010-11, 2015-16)           | 3.0 (2.4 – 3.6)                                                           | 2.0 (1.4 – 2.6)                                                            | 4.7 (4.3 – 5.1)                                                           | 3.4 (3.1 – 3.8)                                                            |
| Lithuania (2013-14, 2018-19)        | 4.6 (4.2 – 5.1)                                                           | 4.8 (4.4 – 5.2)                                                            | 5.5 (5.1 – 5.8)                                                           | 4.6 (4.3 – 5.0)                                                            |
| Netherlands (2015-16)               | 4.0 (4.0 – 4.0)                                                           | ..                                                                         | 7.6 (7.6 – 7.6)                                                           | ..                                                                         |
| Norway (2013-14)                    | 4.4 (4.1 – 4.7)                                                           | ..                                                                         | 3.6 (3.3 – 3.8)                                                           | ..                                                                         |
| Scotland (2013-14, 2018-19)         | 3.4 (3.2 – 3.7)                                                           | 3.4 (3.2 – 3.7)                                                            | 5.1 (4.4 – 5.1)                                                           | 4.9 (4.7 – 5.2)                                                            |
| Singapore (2015-16)                 | 6.9 (6.7 – 7.0)                                                           | ..                                                                         | 6.4 (6.2 – 6.5)                                                           | ..                                                                         |
| South Korea (2009-10, 2014-15)      | 6.1 (5.6 – 6.7)                                                           | 6.0 (5.5 – 6.4)                                                            | 4.7 (4.0 – 5.3)                                                           | 4.3 (3.8 – 4.7)                                                            |
| Spain (2010-11, 2015-16)            | 3.9 (3.7 – 4.1)                                                           | 3.3 (3.2 – 3.5)                                                            | 3.4 (3.3 – 3.6)                                                           | 2.7 (2.6 – 2.9)                                                            |
| Taiwan (2005-06, 2010-11)           | 10.1 (9.6 – 10.7)                                                         | 9.9 (9.5 – 10.3)                                                           | 8.7 (8.3 – 9.1)                                                           | 8.0 (7.7 – 8.3)                                                            |
| United Kingdom (2007-08, 2012-13)   | 6.7 (6.7 – 6.7)                                                           | 6.1 (6.1 – 6.1)                                                            | 5.7 (5.7 – 5.7)                                                           | 5.2 (5.2 – 5.2)                                                            |
| United States (2009-10, 2014-15)    | 7.8 (7.8 – 7.8)                                                           | 5.9 (5.9 – 6.0)                                                            | 7.0 (7.0 – 7.1)                                                           | 6.9 (6.8 – 6.9)                                                            |

Data in parentheses represent 2.5% and 97.5% confidence intervals. Clalit = Clalit Health Services; Maccabi = Maccabi Health Services.

**Supplementary table 13: Years of life lost to diabetes at age 60 years across the 23 jurisdictions**

|                                     | Males                                                                     |                                                                            | Females                                                                   |                                                                            |
|-------------------------------------|---------------------------------------------------------------------------|----------------------------------------------------------------------------|---------------------------------------------------------------------------|----------------------------------------------------------------------------|
|                                     | Years of life lost to type 2 diabetes at age 20 (95% CI), first timepoint | Years of life lost to type 2 diabetes at age 20 (95% CI), second timepoint | Years of life lost to type 2 diabetes at age 20 (95% CI), first timepoint | Years of life lost to type 2 diabetes at age 20 (95% CI), second timepoint |
| Australia (2013-14, 2018-19)        | 3·2 (3·2 – 3·3)                                                           | 3·3 (3·2 – 3·4)                                                            | 3·0 (2·9 – 3·1)                                                           | 3·1 (3·1 – 3·2)                                                            |
| Canada (2011-12, 2016-17)           | 4·2 (4·2 – 4·3)                                                           | 4·0 (4·0 – 4·0)                                                            | 4·3 (4·3 – 4·3)                                                           | 4·1 (4·1 – 4·2)                                                            |
| Denmark (2013-14, 2018-19)          | 4·9 (4·8 – 5·0)                                                           | 5·1 (5·0 – 5·2)                                                            | 4·3 (4·0 – 4·4)                                                           | 4·4 (4·3 – 4·5)                                                            |
| Finland (2011-12, 2016-17)          | 2·9 (2·8 – 3·0)                                                           | 3·0 (2·9 – 3·0)                                                            | 2·4 (2·3 – 2·5)                                                           | 2·5 (2·4 – 2·6)                                                            |
| France (2016-17)                    | 2·6 (2·6 – 2·6)                                                           | ..                                                                         | 3·3 (3·3 – 3·3)                                                           | ..                                                                         |
| Germany (2013-14)                   | 3·6 (3·6 – 3·6)                                                           | ..                                                                         | 4·0 (4·0 – 4·0)                                                           | ..                                                                         |
| Hong Kong (2013-14, 2018-19)        | 3·7 (3·6 – 3·8)                                                           | 4·2 (4·2 – 4·3)                                                            | 3·8 (3·7 – 3·9)                                                           | 4·2 (4·2 – 4·3)                                                            |
| Hungary (2018-19)                   | 3·1 (3·0 – 3·1)                                                           | ..                                                                         | 3·7 (3·7 – 3·8)                                                           | ..                                                                         |
| Israel (Clalit) (2010-11, 2015-16)  | 9·1 (9·1 – 9·2)                                                           | 9·6 (9·6 – 9·6)                                                            | 8·8 (8·8 – 8·9)                                                           | 9·0 (9·0 – 9·1)                                                            |
| Israel (Maccabi) (2009-10, 2014-15) | 5·1 (5·0 – 5·1)                                                           | 5·6 (5·5 – 5·7)                                                            | 5·4 (5·2 – 5·6)                                                           | 5·2 (5·1 – 5·4)                                                            |
| Italy (2013-14, 2018-19)            | 4·0 (3·9 – 4·2)                                                           | 4·2 (4·1 – 4·3)                                                            | 4·2 (4·0 – 4·4)                                                           | 3·9 (3·7 – 4·1)                                                            |
| Japan (2017-18)                     | 3·6 (3·6 – 3·6)                                                           | ..                                                                         | 3·9 (3·9 – 4·0)                                                           | ..                                                                         |
| Latvia (2010-11, 2015-16)           | 1·5 (1·2 – 1·8)                                                           | 1·1 (0·8 – 1·4)                                                            | 3·2 (3·0 – 3·4)                                                           | 2·5 (2·4 – 2·7)                                                            |
| Lithuania (2013-14, 2018-19)        | 2·5 (2·3 – 2·7)                                                           | 2·5 (2·4 – 2·7)                                                            | 3·9 (3·7 – 4·1)                                                           | 3·3 (3·1 – 3·5)                                                            |
| Netherlands (2015-16)               | 3·3 (3·3 – 3·3)                                                           | ..                                                                         | 6·4 (6·4 – 6·4)                                                           | ..                                                                         |
| Norway (2013-14)                    | 3·1 (3·0 – 3·2)                                                           | ..                                                                         | 2·8 (2·6 – 3·0)                                                           | ..                                                                         |
| Scotland (2013-14, 2018-19)         | 2·7 (2·3 – 2·7)                                                           | 2·5 (2·4 – 2·6)                                                            | 3·3 (3·1 – 3·4)                                                           | 3·6 (3·5 – 3·8)                                                            |
| Singapore (2015-16)                 | 3·9 (3·8 – 4·1)                                                           | ..                                                                         | 4·7 (4·7 – 4·8)                                                           | ..                                                                         |
| South Korea (2009-10, 2014-15)      | 4·1 (3·8 – 4·4)                                                           | 3·9 (3·7 – 4·2)                                                            | 3·7 (3·3 – 4·1)                                                           | 3·4 (3·1 – 3·7)                                                            |
| Spain (2010-11, 2015-16)            | 3·0 (3·0 – 3·1)                                                           | 2·3 (2·3 – 2·4)                                                            | 3·1 (3·0 – 3·3)                                                           | 2·3 (2·2 – 2·5)                                                            |
| Taiwan (2005-06, 2010-11)           | 6·8 (6·6 – 7·0)                                                           | 7·1 (6·9 – 7·3)                                                            | 7·0 (6·8 – 7·2)                                                           | 6·9 (6·7 – 7·1)                                                            |
| United Kingdom (2007-08, 2012-13)   | 3·7 (3·7 – 3·7)                                                           | 3·4 (3·4 – 3·4)                                                            | 3·3 (3·3 – 3·3)                                                           | 3·0 (3·0 – 3·0)                                                            |
| United States (2009-10, 2014-15)    | 4·6 (4·6 – 4·6)                                                           | 3·9 (3·9 – 3·9)                                                            | 4·7 (4·6 – 4·7)                                                           | 4·6 (4·6 – 4·7)                                                            |

Data in parentheses represent 2·5% and 97·5% confidence intervals. Clalit = Clalit Health Services; Maccabi = Maccabi Health Services.

**Supplementary figure 1: Change in life expectancy of males with and without type 2 diabetes across time-points by jurisdiction**

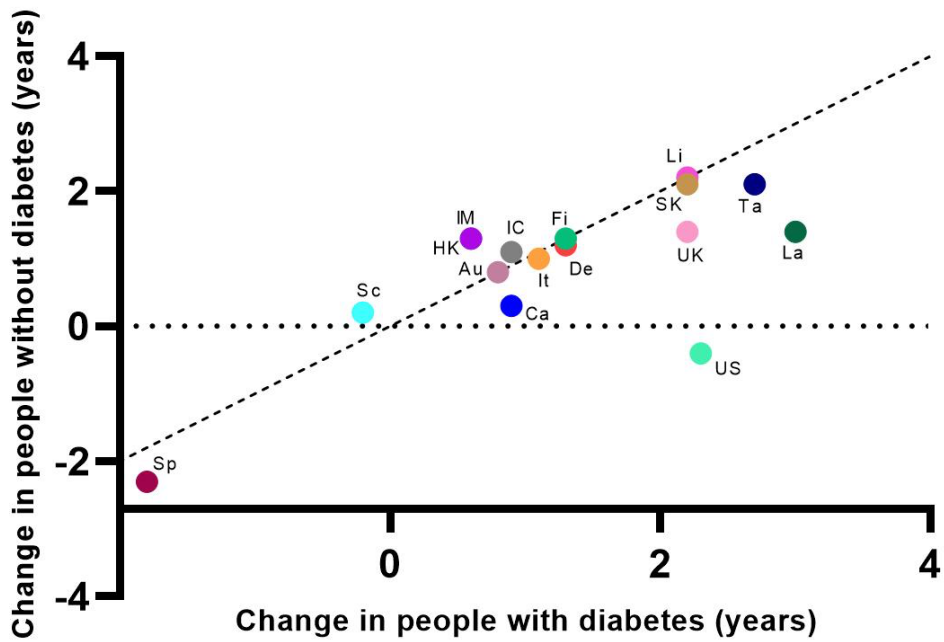

*Clalit = Clalit Health Services; Maccabi = Maccabi Health Services. Dashed line represents line of unity, with points to the right of the line representing greater changes in people with type 2 diabetes.*

**Supplementary figure 2: Change in life expectancy of females with and without type 2 diabetes across time-points by jurisdiction**

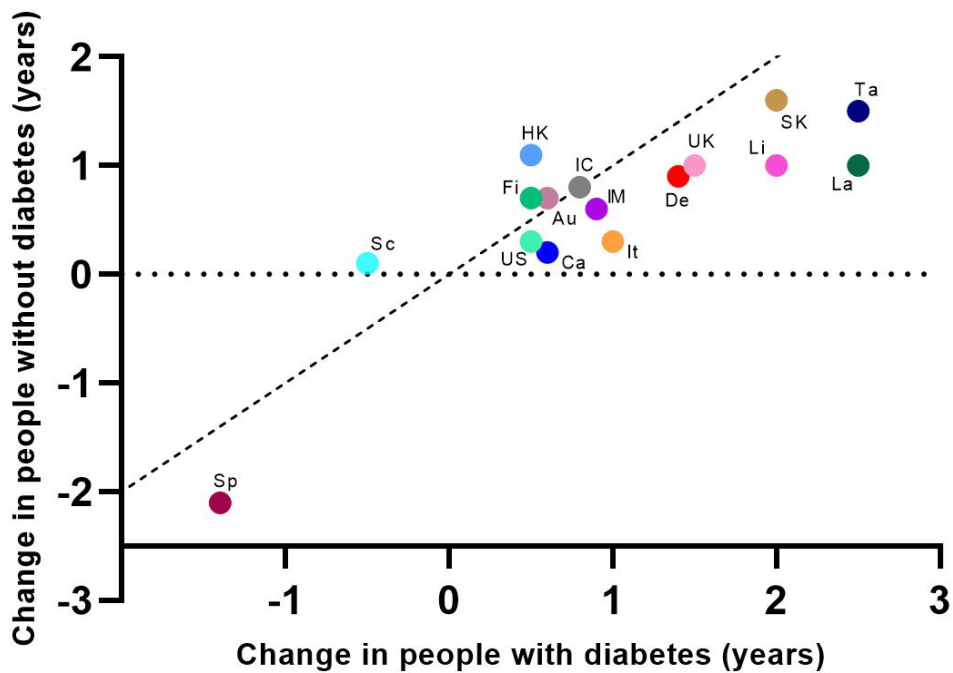

*Clalit = Clalit Health Services; Maccabi = Maccabi Health Services. Dashed line represents line of unity, with points to the right of the line representing greater changes in people with type 2 diabetes.*

Supplementary figure 3: Years of life lost to type 2 diabetes at age 40 years by jurisdiction, males

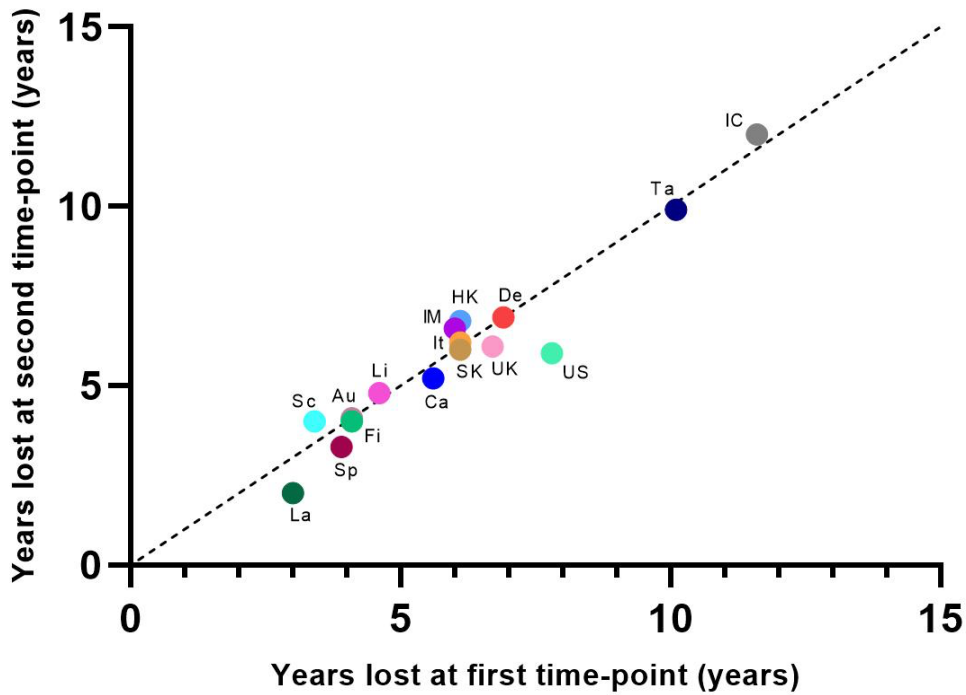

Clalit = Clalit Health Services; Maccabi = Maccabi Health Services. Dashed line represents line of unity, with points to the right of the line representing greater years lost at first time-point.

Supplementary figure 4: Years of life lost to type 2 diabetes at age 40 years by jurisdiction, females

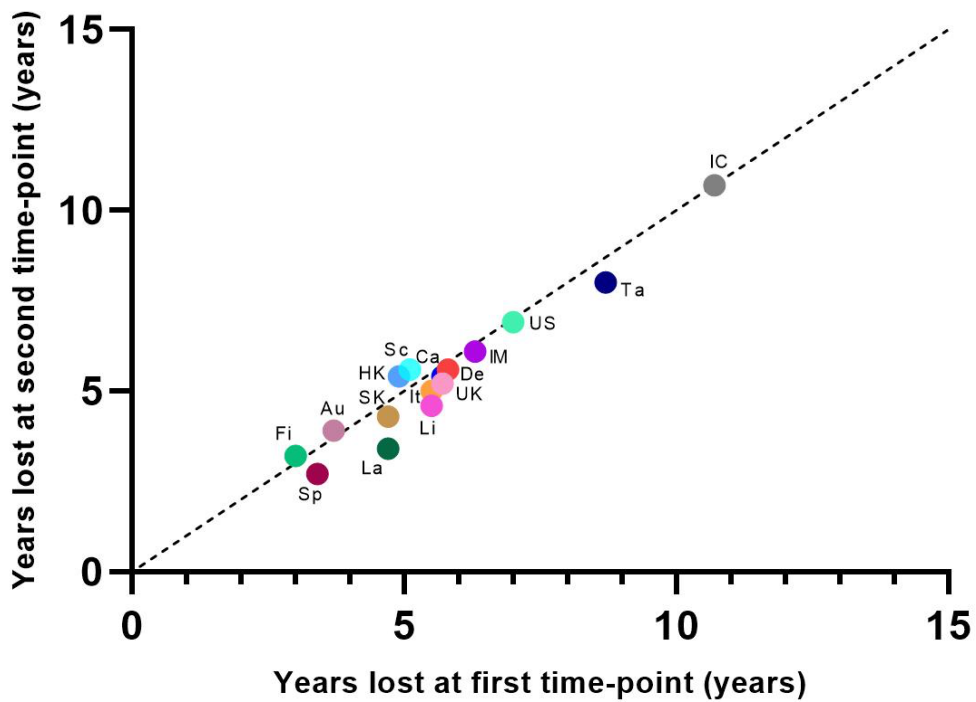

Clalit = Clalit Health Services; Maccabi = Maccabi Health Services. Dashed line represents line of unity, with points to the right of the line representing greater years lost at first time-point.



Supplementary figure 5: Years of life lost to type 2 diabetes at age 60 years by jurisdiction, males

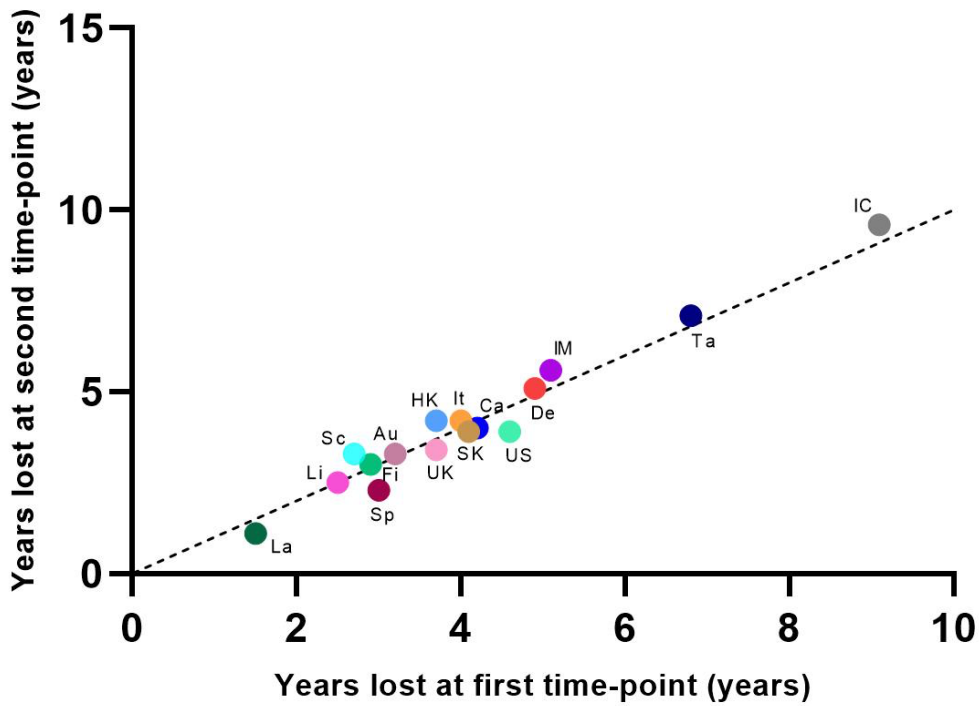

Clalit = Clalit Health Services; Maccabi = Maccabi Health Services. Dashed line represents line of unity, with points to the right of the line representing greater years lost at first time-point.

Supplementary figure 6: Years of life lost to type 2 diabetes at age 60 by jurisdiction, females

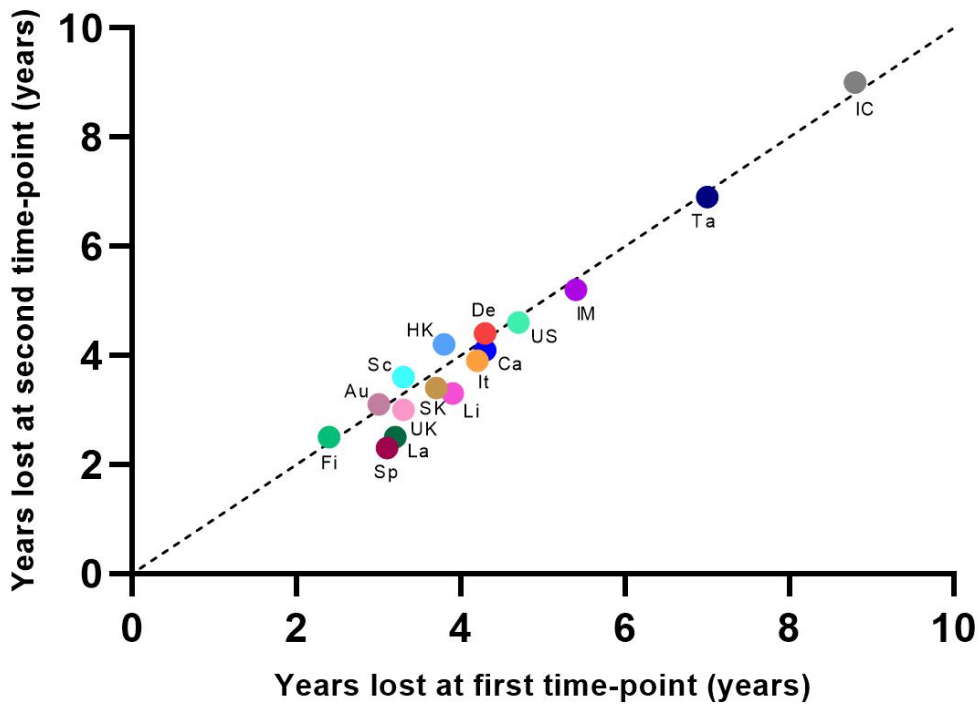

Clalit = Clalit Health Services; Maccabi = Maccabi Health Services. Dashed line represents line of unity, with points to the right of the line representing greater years lost at first time-point.

**Legend for Supplementary Figures 1 – 6:**

*Au* = Australia  
*Ca* = Canada  
*De* = Denmark  
*Fi* = Finland  
*HK* = Hong Kong  
*IC* = Israel (Clalit)  
*IM* = Israel (Maccabi)  
*It* = Italy  
*La* = Latvia  
*Li* = Lithuania  
*Sc* = Scotland  
*SK* = South Korea  
*Sp* = Spain  
*Ta* = Taiwan  
*UK* = United Kingdom  
*US* = United States
